# Supplementary material
Source: PubMed Central journal article supplement (PMC10257472)
Supplement: NIHMS1887571-supplement-Supplemental_Table_1__Taqman_assays_used_to_interrogate_gene_expression_in_aged_and_young_human_BM-MSCs_.pdf [file NIHMS1887571-supplement-Supplemental_Table_1__Taqman_assays_used_to_interrogate_gene_expression_in_aged_and_young_human_BM-MSCs_.pdf]

**Supplemental Table 1: Taqman assays used to interrogate gene expression in aged and young human BM-MSCs.**

| Gene ID       | Assay ID | Gene ID       | Assay ID |
|---------------|----------|---------------|----------|
| Hs00174179_m1 | ACE      | Hs01085825_m1 | KCND1    |
| Hs99999903_m1 | ACTB     | Hs00174029_m1 | KIT      |
| Hs00153853_m1 | ADAM10   | Hs00757864_m1 | LIMS1    |
| Hs01379255_g1 | ADM5     | Hs01554597_m1 | MEF2C    |
| Hs00287594_m1 | AFAP1L2  | Hs00236988_g1 | MIF      |
| Hs00411286_m1 | AGR3     | Hs00153510_m1 | MME      |
| Hs00375822_m1 | ANGPT1   | Hs00968305_m1 | MMP3     |
| Hs01048042_m1 | ANGPT2   | Hs00234579_m1 | MMP9     |
| Hs00984230_m1 | B2M      | Hs00899726_m1 | MORC3    |
| Hs99999018_m1 | BCL2     | Hs04225119_g1 | NANOGNB  |
| Hs00236329_m1 | BCL2L1   | Hs00609976_m1 | NGFR     |
| Hs01055564_m1 | BMP2     | Hs01075529_m1 | NOS2     |
| Hs00171632_m1 | BST2     | Hs00276431_m1 | NOX4     |
| Hs00234140_m1 | CCL2     | Hs02339479_g1 | NPM1     |
| Hs00234142_m1 | CCL3     | Hs01573922_m1 | NT5E     |
| Hs00765553_m1 | CCND1    | Hs00696862_m1 | PCNA     |
| Hs01033303_m1 | CD200    | Hs00377253_m1 | PDCD4    |
| Hs00213164_m1 | CD320    | Hs00964426_m1 | PDGFa    |
| Hs00156390_m1 | CD63     | Hs01019589_s1 | PDGFRb   |
| Hs00154355_m1 | CD68     | Hs01065282_m1 | PECAM1   |
| Hs00269961_m1 | CD74     | Hs00182176_m1 | PGF      |
| Hs00174717_m1 | CD81     | Hs00182181_m1 | PLAUR    |
| Hs00362607_m1 | CD93     | Hs00383235_m1 | PTN      |
| Hs00365982_m1 | CD99     | Hs00898488_m1 | PTPRC    |
| Hs00901463_m1 | CDH5     | Hs00161050_m1 | PVRL1    |
| Hs00153439_m1 | CFLAR    | Hs01071562_m1 | PVRL2    |
| Hs00355049_m1 | CTNNB1   | Hs99999901_s1 | R18s     |
| Hs00200713_m1 | CTRC     | Hs01092205_g1 | Rap1A    |
| Hs00930455_m1 | CXCL12   | Hs00991065_m1 | S100Z    |
| Hs00222859_m1 | CXCL16   | Hs01009005_m1 | SIRT1    |
| Hs01001580_m1 | ERBB2    | Hs00195591_m1 | SNAI1    |
| Hs01076029_m1 | F3       | Hs00533490_m1 | SOD1     |
| Hs00531110_m1 | FAS      | Hs01553554_m1 | SOD2     |
| Hs00999691_m1 | FGF4     | Hs00162090_m1 | SOD3     |
| Hs00181829_m1 | FGF9     | Hs00911929_m1 | TBX2     |
| Hs01552926_m1 | FGFR2    | Hs00195612_m1 | TBX3     |
| Hs01052936_m1 | FLT1     | Hs00608187_m1 | TGFa     |
| Hs01073586_m1 | FOXO1    | Hs00998133_m1 | TGFb1    |
| Hs00201853_m1 | FZD4     | Hs00178500_m1 | TIE1     |
| Hs00934682_m1 | GATA6    | Hs00152939_m1 | TLR4     |
| Hs00704434_s1 | GOLGA6L2 | Hs99999043_m1 | TNF      |
| Hs00181813_m1 | HBEGF    | Hs00961749_m1 | TNFRSF1B |
| Hs00300159_m1 | HGF      | Hs01034249_m1 | TP53     |
| Hs00936371_m1 | HIF1a    | Hs00264218_s1 | UCN2     |
| Hs00181213_m1 | IGFBP5   | Hs00174239_m1 | VCAM1    |
| Hs01075667_m1 | IL6R     | Hs00900055_m1 | VEGFa    |
| Hs01547673_m1 | ITGA5    | Hs01011247_m1 | WNT1     |
| Hs01001469_m1 | ITGB3    | Hs01087915_m1 | WRN      |
