# Supplementary material
Source: PubMed Central journal article supplement (PMC10257472)
Supplement: NIHMS1887571-supplement-Supplemental_Table_2__Cluster_one_defining_genes.pdf [file NIHMS1887571-supplement-Supplemental_Table_2__Cluster_one_defining_genes.pdf]

## Supplemental Table 2: Cluster one defining genes

| Gene   | P-value     | Status      |
|--------|-------------|-------------|
| MIF    | 1.95206E-45 | upregulated |
| MORC3  | 1.4607E-44  | upregulated |
| NT5E   | 1.66218E-40 | upregulated |
| CTNNB1 | 5.47142E-40 | upregulated |
| SOD1   | 2.28116E-38 | upregulated |
| CD63   | 1.76208E-35 | upregulated |
| ADAM10 | 2.33848E-34 | upregulated |
| CD320  | 4.18101E-32 | upregulated |
| Rap1A  | 6.93382E-31 | upregulated |
| PDGFRB | 1.80801E-30 | upregulated |
| TGFB1  | 2.18193E-30 | upregulated |
| ITGA5  | 8.81141E-28 | upregulated |
| TP53   | 3.01611E-27 | upregulated |
| FAS    | 2.12521E-25 | upregulated |
| B2M    | 3.2929E-25  | upregulated |
| CD99   | 1.98944E-23 | upregulated |
| CFLAR  | 1.36771E-20 | upregulated |
| CD68   | 2.62381E-20 | upregulated |
| CD81   | 5.03486E-20 | upregulated |
| PDGFA  | 1.03635E-18 | upregulated |
| PDCD4  | 3.27555E-17 | upregulated |
| SOD2   | 5.23269E-16 | upregulated |
| CCND1  | 1.03041E-15 | upregulated |
| VEGFA  | 3.11367E-15 | upregulated |
| SIRT1  | 8.1859E-14  | upregulated |
| FOXM1  | 8.61078E-11 | upregulated |
| PLAUR  | 4.81397E-10 | upregulated |

| Gene   | P-value     | Status        |
|--------|-------------|---------------|
| TLR4   | 6.8748E-10  | upregulated   |
| BCL2L1 | 9.13531E-10 | upregulated   |
| CXCL12 | 1.88006E-09 | upregulated   |
| PVRL1  | 5.26804E-09 | upregulated   |
| TBX2   | 9.4677E-09  | upregulated   |
| TBX3   | 2.27421E-08 | upregulated   |
| ERBB2  | 2.62096E-08 | upregulated   |
| ACTB   | 2.85201E-08 | upregulated   |
| ANGPT1 | 3.30088E-08 | upregulated   |
| WRN    | 6.85011E-07 | upregulated   |
| ANGPT2 | 7.87546E-07 | upregulated   |
| ITGB3  | 1.00952E-06 | upregulated   |
| NPM1   | 1.57272E-06 | upregulated   |
| GATA6  | 1.89401E-06 | upregulated   |
| SOD3   | 2.04331E-06 | upregulated   |
| PCNA   | 0.00011182  | upregulated   |
| PGF    | 0.000139334 | upregulated   |
| CCL2   | 0.000175851 | upregulated   |
| FGFR2  | 0.00134206  | downregulated |
| IL6R   | 0.002082374 | upregulated   |
| MEF2C  | 0.005215559 | upregulated   |
| NGFR   | 0.013336497 | upregulated   |
| PTN    | 0.019815243 | upregulated   |
| BST2   | 0.023135206 | upregulated   |
| HBEGF  | 0.023914456 | upregulated   |
